# Supplementary material
Source: publisher figshare collection journal article supplement (https://frontiersin.figshare.com/ndownloader/files/17418704)
Supplement: Supplementary file [file 17418704]

Online-figure1

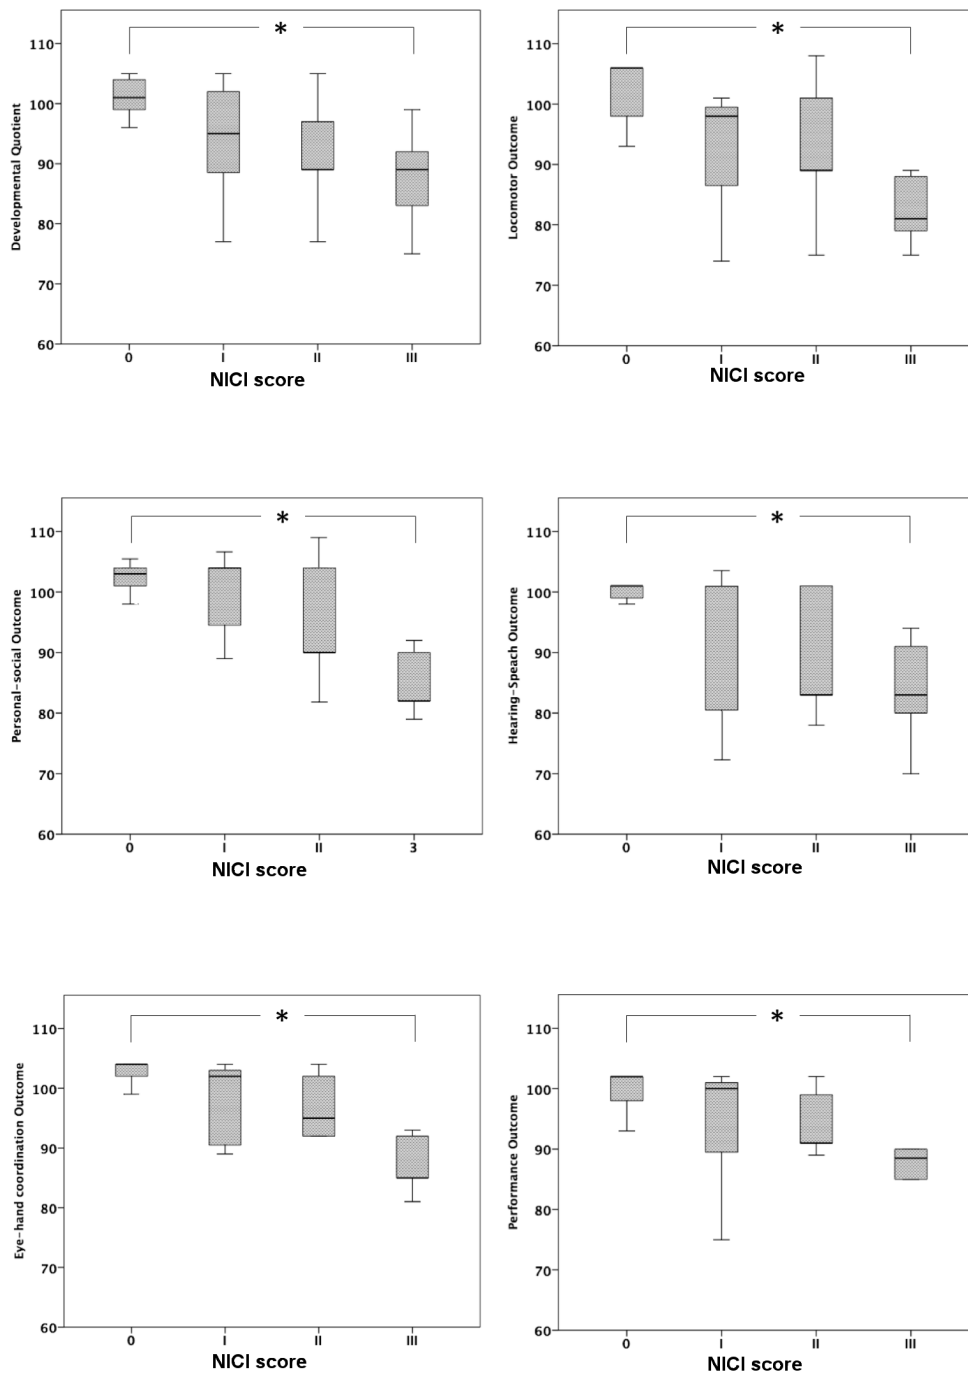

**Online-Figure 1. Relationship between the Neurodevelopmental Griffith's subscale scores and the Neonatal Intensive Care Invasiveness (NICI) score categories.** Note that Neurodevelopmental scores are significantly different in the four NICI categories, especially when comparing Controls (0 category) and neonates that experienced the highest number of invasive

procedures (III category). Note that **0** indicates no painful events during the early post-natal period or <5 skin breaks (i.e. heel lances, central line insertion, intramuscular injection); **I**, >5 skin breaks or neonatal endotracheal intubation; **II**, >5 skin breaks and neonatal endotracheal intubation; **III**, surgical interventions (i.e. patent ductus arteriosus ligation, surgical necrotizing enterocolitis).

\* indicates  $P=.01$ .
